# Supplementary material for: Microgravity experiments confirm densest stable hard sphere crystal is most symmetric
Source: Research Square preprint supplement (doi:10.21203/rs.3.rs-8536211/v1), 2026-02-06
Supplement: Supplementary file 2 [file bf3435e3d6664ff2c6f6c393.docx]

**Table 1. Sample C3. Z-stacks featuring four successive hexagonal planes.** The following datasets for particles in pairs of images of four successive hexagonal planes, 1&2, 1&3, 2&3, 2&4, 3&4 and 1&4, are presented for each stack: Coordinates X,Y,Z of the center of the stack top image; the number of particles N in the first image of the listed pair; the mean value and standard deviation (s.d.) of the separation 𝛿 between nearby projections on the X-Y plane of particle centers in the listed pair; 5-10% of particles at the image boundary are not included. A slight variation of N from pair to pair in a row is caused by the adaptive adjustment of parameters in simultaneous processing of both images in the listed pair.

| **Stack**  **No** | **X,Y,Z coordinates ,** | **Images 1 & 2** | | | **Images 1 & 3** | | | **Images 2 & 3** | | | **Images 2 & 4** | | | **Images 3 & 4** | | | **Images 1 & 4** | | |
| --- | --- | --- | --- | --- | --- | --- | --- | --- | --- | --- | --- | --- | --- | --- | --- | --- | --- | --- | --- |
| **N** | **Mean** | **s.d.** | **N** | **Mean** | **s.d.** | **N** | **Mean** | **s.d.** | **N** | **Mean** | **s.d.** | **N** | **Mean** | **s.d.** | **N** | **Mean** | **s.d.** |
| 1 | -8902, 0, 20 | 682 | 0.65 | 0.20 | 681 | 0.68 | 0.18 | 688 | 0.66 | 0.19 | 667 | 0.67 | 0.24 | 662 | 0.67 | 0.24 | 663 | 0.29 | 0.19 |
| 2 | 97, 0, 5 | 664 | 0.66 | 0.21 | 677 | 0.69 | 0.18 | 673 | 0.68 | 0.19 | 680 | 0.64 | 0.23 | 683 | 0.64 | 0.23 | 668 | 0.23 | 0.17 |
| 3 | -550, -250, 5 | 657 | 0.69 | 0.16 | 657 | 0.68 | 0.19 | 662 | 0.67 | 0.20 | 655 | 0.68 | 0.16 | 645 | 0.68 | 0.16 | 656 | 0.24 | 0.19 |
| 4 | 800, -250, 5 | 643 | 0.61 | 0.26 | 632 | 0.68 | 0.26 | 643 | 0.65 | 0.23 | 642 | 0.63 | 0.19 | 662 | 0.63 | 0.19 | 668 | 0.24 | 0.19 |
| 5 | 1100, -250, 25 | 633 | 0.61 | 0.25 | 657 | 0.67 | 0.14 | 645 | 0.68 | 0.19 | 637 | 0.62 | 0.23 | 647 | 0.62 | 0.23 | 664 | 0.26 | 0.20 |
| 6 | -400, -250, 5 | 645 | 0.56 | 0.20 | 630 | 0.50 | 0.22 | 661 | 0.69 | 0.19 | 656 | 0.65 | 0.18 | 666 | 0.65 | 0.18 | 680 | 0.23 | 0.18 |
| 7 | -8902, 0, 35 | 681 | 0.65 | 0.20 | 686 | 0.62 | 0.23 | 685 | 0.63 | 0.25 | 676 | 0.68 | 0.24 | 673 | 0.68 | 0.24 | 674 | 0.23 | 0.16 |
| 8 | -9002, 0, 5 | 678 | 0.64 | 0.22 | 674 | 0.53 | 0.23 | 677 | 0.61 | 0.22 | 685 | 0.56 | 0.24 | 665 | 0.56 | 0.24 | 658 | 0.28 | 0.21 |
| 9 | 1250, -250, 5 | 647 | 0.65 | 0.26 | 625 | 0.61 | 0.22 | 651 | 0.60 | 0.19 | 676 | 0.73 | 0.21 | 658 | 0.67 | 0.19 | 671 | 0.28 | 0.19 |
| 10 | -1600, -280, 5 | 666 | 0.63 | 0.18 | 655 | 0.69 | 0.21 | 667 | 0.67 | 0.23 | 635 | 0.62 | 0.21 | 668 | 0.59 | 0.28 | 667 | 0.24 | 0.18 |
| 11 | -2, 0, 80 | 645 | 0.63 | 0.18 | 664 | 0.69 | 0.21 | 668 | 0.65 | 0.21 | 637 | 0.64 | 0.22 | 679 | 0.64 | 0.22 | 661 | 0.23 | 0.19 |
| 12 | -2, 0, 100 | 685 | 0.69 | 0.19 | 670 | 0.56 | 0.16 | 678 | 0.67 | 0.17 | 672 | 0.57 | 0.21 | 672 | 0.62 | 0.18 | 630 | 0.24 | 0.20 |
| 13 | 97, 0, 60 | 668 | 0.70 | 0.19 | 656 | 0.65 | 0.21 | 656 | 0.65 | 0.22 | 645 | 0.71 | 0.17 | 684 | 0.66 | 0.24 | 669 | 0.25 | 0.19 |
| 14 | -102, 0, 120 | 660 | 0.66 | 0.22 | 654 | 0.68 | 0.22 | 666 | 0.66 | 0.20 | 664 | 0.65 | 0.20 | 639 | 0.65 | 0.26 | 659 | 0.28 | 0.20 |
| 15 | -102, 0, 150 | 680 | 0.59 | 0.23 | 641 | 0.56 | 0.23 | 649 | 0.62 | 0.17 | 655 | 0.67 | 0.22 | 674 | 0.66 | 0.25 | 678 | 0.29 | 0.20 |
| 16 | 197, 0, 20 | 659 | 0.66 | 0.20 | 672 | 0.48 | 0.24 | 638 | 0.65 | 0.20 | 673 | 0.66 | 0.22 | 660 | 0.65 | 0.26 | 665 | 0.23 | 0.20 |
| 17 | 197, 0, 35 | 684 | 0.63 | 0.26 | 690 | 0.78 | 0.14 | 673 | 0.69 | 0.21 | 667 | 0.64 | 0.20 | 662 | 0.55 | 0.18 | 662 | 0.24 | 0.20 |
| 18 | -1300, -250, 5 | 694 | 0.69 | 0.21 | 625 | 0.73 | 0.18 | 675 | 0.66 | 0.21 | 674 | 0.70 | 0.25 | 640 | 0.64 | 0.22 | 660 | 0.22 | 0.20 |
| 19 | -1800, -280, 0 | 680 | 0.69 | 0.24 | 672 | 0.67 | 0.21 | 673 | 0.62 | 0.23 | 677 | 0.65 | 0.22 | 652 | 0.68 | 0.22 | 662 | 0.25 | 0.19 |
| 20 | -1150, -250, 5 | 673 | 0.62 | 0.20 | 653 | 0.69 | 0.19 | 678 | 0.68 | 0.19 | 665 | 0.66 | 0.18 | 666 | 0.66 | 0.16 | 664 | 0.25 | 0.21 |
| 21 | -1000, -250, 5 | 658 | 0.62 | 0.20 | 654 | 0.61 | 0.19 | 669 | 0.64 | 0.21 | 650 | 0.66 | 0.19 | 650 | 0.63 | 0.17 | 664 | 0.24 | 0.17 |
| 22 | -850, -250, 5 | 661 | 0.64 | 0.22 | 674 | 0.75 | 0.16 | 653 | 0.64 | 0.22 | 686 | 0.66 | 0.19 | 659 | 0.57 | 0.19 | 684 | 0.25 | 0.19 |
| 23 | -1400, -280, 0 | 669 | 0.66 | 0.18 | 637 | 0.60 | 0.21 | 668 | 0.68 | 0.19 | 673 | 0.66 | 0.23 | 669 | 0.62 | 0.18 | 669 | 0.25 | 0.22 |
| 24 | -700, -250, 5 | 648 | 0.65 | 0.20 | 661 | 0.56 | 0.21 | 650 | 0.69 | 0.23 | 653 | 0.63 | 0.17 | 657 | 0.65 | 0.19 | 656 | 0.27 | 0.20 |
| 25 | -1200, -280, 0 | 655 | 0.59 | 0.19 | 690 | 0.82 | 0.21 | 633 | 0.62 | 0.22 | 691 | 0.67 | 0.21 | 638 | 0.70 | 0.24 | 665 | 0.24 | 0.19 |
| 26 | -1000, -100, 0 | 678 | 0.69 | 0.20 | 686 | 0.63 | 0.21 | 703 | 0.65 | 0.21 | 674 | 0.64 | 0.21 | 668 | 0.71 | 0.23 | 635 | 0.24 | 0.21 |
| 27 | -250, -250, 5 | 662 | 0.66 | 0.22 | 681 | 0.64 | 0.12 | 673 | 0.67 | 0.19 | 658 | 0.61 | 0.21 | 678 | 0.67 | 0.19 | 657 | 0.24 | 0.22 |
| 28 | -1000, -500, 0 | 662 | 0.70 | 0.24 | 619 | 0.66 | 0.22 | 655 | 0.64 | 0.17 | 659 | 0.69 | 0.24 | 664 | 0.68 | 0.25 | 654 | 0.26 | 0.20 |
| 29 | 0, -250, 5 | 673 | 0.60 | 0.24 | 658 | 0.45 | 0.25 | 657 | 0.66 | 0.20 | 673 | 0.60 | 0.21 | 663 | 0.69 | 0.20 | 664 | 0.23 | 0.17 |
| 30 | 50, -250, 5 | 663 | 0.67 | 0.20 | 676 | 0.70 | 0.20 | 675 | 0.65 | 0.23 | 653 | 0.68 | 0.20 | 652 | 0.65 | 0.21 | 658 | 0.20 | 0.20 |
| 31 | 200, -250, 5 | 678 | 0.65 | 0.22 | 703 | 0.65 | 0.18 | 668 | 0.67 | 0.22 | 669 | 0.64 | 0.22 | 652 | 0.64 | 0.22 | 671 | 0.25 | 0.19 |
| 32 | 350, -250, 5 | 654 | 0.70 | 0.19 | 657 | 0.71 | 0.24 | 631 | 0.66 | 0.21 | 677 | 0.68 | 0.22 | 651 | 0.67 | 0.23 | 665 | 0.24 | 0.19 |
| 33 | 500, -250, 5 | 685 | 0.63 | 0.20 | 634 | 0.62 | 0.15 | 668 | 0.65 | 0.19 | 645 | 0.58 | 0.23 | 671 | 0.68 | 0.24 | 658 | 0.22 | 0.21 |
| 34 | 650, -250, 5 | 675 | 0.68 | 0.22 | 640 | 0.59 | 0.21 | 700 | 0.70 | 0.21 | 657 | 0.61 | 0.19 | 656 | 0.66 | 0.22 | 651 | 0.28 | 0.20 |
| 35 | 950, -250, 5 | 643 | 0.65 | 0.25 | 647 | 0.75 | 0.19 | 645 | 0.66 | 0.20 | 666 | 0.65 | 0.23 | 654 | 0.64 | 0.22 | 664 | 0.27 | 0.20 |
| 36 | 1400, -250, 5 | 660 | 0.67 | 0.19 | 638 | 0.64 | 0.12 | 666 | 0.62 | 0.22 | 665 | 0.62 | 0.22 | 673 | 0.65 | 0.18 | 642 | 0.20 | 0.18 |
| 37 | 1550, -250, 5 | 665 | 0.66 | 0.22 | 670 | 0.58 | 0.19 | 675 | 0.69 | 0.19 | 651 | 0.66 | 0.24 | 665 | 0.58 | 0.23 | 650 | 0.26 | 0.20 |
| 38 | 1700, -250, 5 | 663 | 0.69 | 0.21 | 682 | 0.65 | 0.19 | 677 | 0.69 | 0.22 | 678 | 0.65 | 0.22 | 663 | 0.63 | 0.22 | 644 | 0.24 | 0.21 |
| 39 | 1850, -250, 5 | 661 | 0.63 | 0.24 | 656 | 0.59 | 0.19 | 650 | 0.67 | 0.22 | 663 | 0.67 | 0.20 | 664 | 0.60 | 0.19 | 678 | 0.26 | 0.18 |
| 40 | 2150, -250, 5 | 656 | 0.62 | 0.21 | 656 | 0.76 | 0.16 | 643 | 0.66 | 0.23 | 665 | 0.67 | 0.23 | 671 | 0.64 | 0.24 | 659 | 0.24 | 0.19 |
| 41 | 2300, -250, 5 | 650 | 0.65 | 0.24 | 642 | 0.61 | 0.14 | 664 | 0.70 | 0.20 | 665 | 0.63 | 0.22 | 655 | 0.65 | 0.19 | 652 | 0.24 | 0.19 |
| 42 | 2450, -250, 5 | 646 | 0.67 | 0.17 | 624 | 0.62 | 0.21 | 676 | 0.67 | 0.19 | 627 | 0.70 | 0.20 | 656 | 0.65 | 0.17 | 677 | 0.23 | 0.18 |
| 43 | 2600, -250, 5 | 680 | 0.67 | 0.20 | 673 | 0.57 | 0.28 | 680 | 0.62 | 0.19 | 672 | 0.64 | 0.28 | 668 | 0.65 | 0.21 | 667 | 0.23 | 0.18 |
| 44 | 2750, -250, 5 | 658 | 0.66 | 0.22 | 672 | 0.68 | 0.24 | 628 | 0.69 | 0.18 | 670 | 0.70 | 0.16 | 665 | 0.63 | 0.23 | 664 | 0.28 | 0.17 |
| 45 | 3050, -250, 5 | 668 | 0.68 | 0.23 | 670 | 0.60 | 0.29 | 637 | 0.67 | 0.22 | 664 | 0.59 | 0.28 | 664 | 0.68 | 0.23 | 653 | 0.28 | 0.19 |
| 46 | 3200, -250, 5 | 667 | 0.70 | 0.20 | 670 | 0.72 | 0.16 | 665 | 0.70 | 0.19 | 655 | 0.66 | 0.16 | 657 | 0.63 | 0.23 | 642 | 0.24 | 0.20 |
| 47 | 3350, -250, 5 | 679 | 0.69 | 0.21 | 665 | 0.66 | 0.20 | 674 | 0.64 | 0.20 | 676 | 0.59 | 0.20 | 682 | 0.64 | 0.25 | 646 | 0.24 | 0.21 |
| 48 | 3500, -250, 5 | 650 | 0.67 | 0.24 | 673 | 0.70 | 0.19 | 647 | 0.65 | 0.20 | 678 | 0.61 | 0.24 | 657 | 0.61 | 0.22 | 670 | 0.24 | 0.19 |
| 49 | 3650, -250, 5 | 674 | 0.63 | 0.24 | 658 | 0.59 | 0.15 | 660 | 0.66 | 0.24 | 652 | 0.66 | 0.21 | 664 | 0.67 | 0.21 | 674 | 0.24 | 0.22 |
| 50 | 3800, -250, 5 | 672 | 0.66 | 0.25 | 655 | 0.68 | 0.25 | 648 | 0.65 | 0.24 | 649 | 0.63 | 0.18 | 672 | 0.63 | 0.25 | 663 | 0.26 | 0.19 |
| 51 | 3950, -250, 5 | 661 | 0.68 | 0.30 | 704 | 0.62 | 0.17 | 671 | 0.68 | 0.21 | 646 | 0.65 | 0.20 | 655 | 0.63 | 0.20 | 658 | 0.22 | 0.18 |
| 52 | 4100, -250, 5 | 648 | 0.60 | 0.23 | 620 | 0.71 | 0.18 | 669 | 0.68 | 0.21 | 661 | 0.66 | 0.16 | 672 | 0.66 | 0.21 | 661 | 0.23 | 0.21 |
| 53 | 4250, -250, 5 | 659 | 0.69 | 0.24 | 619 | 0.80 | 0.20 | 663 | 0.68 | 0.19 | 652 | 0.62 | 0.19 | 650 | 0.58 | 0.17 | 651 | 0.25 | 0.16 |
| 54 | 4440, -250, 5 | 660 | 0.65 | 0.16 | 636 | 0.67 | 0.21 | 656 | 0.61 | 0.17 | 629 | 0.66 | 0.21 | 653 | 0.69 | 0.16 | 641 | 0.24 | 0.20 |
| 55 | 4550, -250, 5 | 632 | 0.70 | 0.17 | 683 | 0.67 | 0.21 | 661 | 0.63 | 0.19 | 643 | 0.67 | 0.25 | 653 | 0.68 | 0.19 | 673 | 0.24 | 0.24 |
| 56 | 5000, -250, 5 | 676 | 0.65 | 0.20 | 655 | 0.58 | 0.23 | 650 | 0.71 | 0.21 | 665 | 0.65 | 0.17 | 661 | 0.64 | 0.21 | 668 | 0.26 | 0.20 |
| 57 | 5150, -250, 5 | 670 | 0.65 | 0.17 | 667 | 0.66 | 0.21 | 690 | 0.61 | 0.23 | 669 | 0.60 | 0.25 | 676 | 0.61 | 0.26 | 664 | 0.24 | 0.17 |
| 58 | 5300, -250, 5 | 660 | 0.68 | 0.25 | 670 | 0.58 | 0.27 | 641 | 0.66 | 0.18 | 663 | 0.66 | 0.26 | 654 | 0.59 | 0.24 | 674 | 0.26 | 0.19 |
| 59 | 5600, -250, 5 | 656 | 0.66 | 0.22 | 656 | 0.54 | 0.19 | 647 | 0.69 | 0.23 | 626 | 0.61 | 0.29 | 665 | 0.70 | 0.26 | 653 | 0.27 | 0.18 |
| 60 | 9800, -250, 5 | 658 | 0.66 | 0.23 | 676 | 0.70 | 0.24 | 674 | 0.62 | 0.24 | 663 | 0.61 | 0.28 | 660 | 0.68 | 0.21 | 661 | 0.29 | 0.19 |
| 61 | 9950, -250, 5 | 675 | 0.66 | 0.19 | 684 | 0.72 | 0.17 | 653 | 0.65 | 0.20 | 673 | 0.61 | 0.18 | 660 | 0.62 | 0.24 | 672 | 0.27 | 0.19 |
| 62 | 10100, -250, 5 | 644 | 0.58 | 0.22 | 668 | 0.65 | 0.24 | 646 | 0.62 | 0.20 | 652 | 0.66 | 0.17 | 683 | 0.62 | 0.18 | 656 | 0.22 | 0.19 |
| 63 | 10400, -250, 5 | 668 | 0.66 | 0.22 | 659 | 0.63 | 0.25 | 659 | 0.69 | 0.22 | 661 | 0.65 | 0.25 | 660 | 0.64 | 0.22 | 656 | 0.25 | 0.22 |
| 64 | 10550, -250, 5 | 687 | 0.65 | 0.21 | 633 | 0.59 | 0.18 | 679 | 0.68 | 0.21 | 688 | 0.62 | 0.18 | 679 | 0.67 | 0.27 | 678 | 0.23 | 0.20 |
| 65 | 10700, -250, 5 | 666 | 0.66 | 0.20 | 626 | 0.68 | 0.25 | 676 | 0.64 | 0.22 | 657 | 0.67 | 0.20 | 672 | 0.69 | 0.23 | 663 | 0.25 | 0.18 |
| 66 | 10850, -250, 5 | 665 | 0.65 | 0.21 | 678 | 0.73 | 0.17 | 641 | 0.62 | 0.19 | 678 | 0.67 | 0.23 | 666 | 0.67 | 0.21 | 652 | 0.26 | 0.18 |
| 67 | 11150, -250, 5 | 638 | 0.67 | 0.15 | 666 | 0.62 | 0.21 | 671 | 0.66 | 0.23 | 679 | 0.67 | 0.21 | 659 | 0.65 | 0.24 | 647 | 0.24 | 0.20 |
| 68 | 11300, -250, 5 | 689 | 0.63 | 0.21 | 673 | 0.60 | 0.22 | 701 | 0.67 | 0.21 | 646 | 0.60 | 0.22 | 664 | 0.68 | 0.17 | 681 | 0.21 | 0.19 |
| 69 | 11600, -250, 5 | 640 | 0.63 | 0.15 | 659 | 0.69 | 0.21 | 654 | 0.64 | 0.20 | 683 | 0.59 | 0.16 | 670 | 0.65 | 0.20 | 670 | 0.28 | 0.19 |
| 70 | 11900, -250, 5 | 674 | 0.60 | 0.16 | 656 | 0.65 | 0.23 | 669 | 0.69 | 0.17 | 673 | 0.61 | 0.22 | 661 | 0.67 | 0.21 | 658 | 0.25 | 0.20 |
| 71 | 12050, -250, 5 | 689 | 0.70 | 0.20 | 639 | 0.59 | 0.26 | 665 | 0.67 | 0.22 | 660 | 0.58 | 0.26 | 674 | 0.68 | 0.17 | 639 | 0.25 | 0.19 |
| 72 | 12200, -250, 5 | 659 | 0.62 | 0.25 | 677 | 0.62 | 0.16 | 657 | 0.67 | 0.19 | 647 | 0.60 | 0.16 | 640 | 0.65 | 0.24 | 670 | 0.28 | 0.20 |
| 73 | 12500, -250, 5 | 629 | 0.68 | 0.24 | 679 | 0.60 | 0.21 | 691 | 0.65 | 0.21 | 655 | 0.67 | 0.17 | 689 | 0.65 | 0.22 | 651 | 0.25 | 0.19 |
| 74 | 12650, -250, 5 | 673 | 0.70 | 0.18 | 662 | 0.63 | 0.21 | 671 | 0.64 | 0.21 | 661 | 0.66 | 0.14 | 657 | 0.64 | 0.20 | 677 | 0.22 | 0.21 |
| 75 | 12800, -250, 5 | 657 | 0.59 | 0.25 | 656 | 0.78 | 0.22 | 647 | 0.63 | 0.24 | 668 | 0.62 | 0.24 | 671 | 0.57 | 0.22 | 652 | 0.23 | 0.16 |
| 76 | 12950, -250, 5 | 634 | 0.67 | 0.24 | 649 | 0.71 | 0.26 | 691 | 0.71 | 0.20 | 671 | 0.68 | 0.15 | 687 | 0.70 | 0.21 | 650 | 0.27 | 0.21 |
| 77 | 13250, -250, 5 | 650 | 0.67 | 0.20 | 693 | 0.63 | 0.24 | 657 | 0.62 | 0.24 | 655 | 0.72 | 0.16 | 680 | 0.65 | 0.25 | 660 | 0.24 | 0.23 |
| 78 | 13400, -250, 5 | 658 | 0.69 | 0.20 | 687 | 0.65 | 0.20 | 666 | 0.65 | 0.23 | 652 | 0.62 | 0.19 | 658 | 0.67 | 0.23 | 674 | 0.24 | 0.18 |
| 79 | 13550, -250, 5 | 659 | 0.65 | 0.24 | 646 | 0.70 | 0.18 | 673 | 0.65 | 0.20 | 675 | 0.65 | 0.17 | 643 | 0.63 | 0.19 | 650 | 0.23 | 0.17 |
| 80 | 3400, -610, 0 | 665 | 0.64 | 0.23 | 701 | 0.66 | 0.22 | 646 | 0.65 | 0.19 | 654 | 0.62 | 0.18 | 660 | 0.67 | 0.23 | 654 | 0.27 | 0.16 |
| 81 | 3600, -610, 0 | 692 | 0.67 | 0.15 | 634 | 0.61 | 0.21 | 669 | 0.67 | 0.24 | 675 | 0.66 | 0.25 | 667 | 0.63 | 0.20 | 634 | 0.24 | 0.17 |
| 82 | -3700, -610, 0 | 625 | 0.66 | 0.23 | 655 | 0.61 | 0.22 | 642 | 0.65 | 0.19 | 681 | 0.64 | 0.22 | 664 | 0.69 | 0.28 | 669 | 0.25 | 0.19 |
| 83 | 3800, -610, 0 | 660 | 0.65 | 0.30 | 683 | 0.72 | 0.20 | 670 | 0.67 | 0.21 | 673 | 0.63 | 0.23 | 677 | 0.62 | 0.20 | 663 | 0.26 | 0.18 |
| 84 | -3900, -610, 0 | 652 | 0.69 | 0.21 | 657 | 0.67 | 0.25 | 662 | 0.63 | 0.24 | 656 | 0.68 | 0.21 | 665 | 0.61 | 0.24 | 650 | 0.23 | 0.22 |
| 85 | 8800, -610, 0 | 643 | 0.69 | 0.22 | 654 | 0.67 | 0.20 | 678 | 0.67 | 0.20 | 659 | 0.62 | 0.20 | 664 | 0.63 | 0.21 | 669 | 0.31 | 0.19 |
| 86 | 13000, -610, 0 | 650 | 0.61 | 0.24 | 652 | 0.72 | 0.15 | 646 | 0.64 | 0.21 | 655 | 0.64 | 0.18 | 660 | 0.67 | 0.20 | 667 | 0.25 | 0.21 |
| 87 | 13200, -610, 0 | 667 | 0.63 | 0.18 | 669 | 0.54 | 0.19 | 694 | 0.65 | 0.19 | 688 | 0.67 | 0.17 | 692 | 0.63 | 0.29 | 660 | 0.28 | 0.20 |
| 88 | 3960, -610, 40 | 687 | 0.69 | 0.14 | 661 | 0.70 | 0.21 | 663 | 0.65 | 0.18 | 656 | 0.65 | 0.25 | 667 | 0.68 | 0.25 | 655 | 0.24 | 0.21 |
| 89 | 4120, -610, 40 | 676 | 0.70 | 0.24 | 669 | 0.66 | 0.15 | 664 | 0.72 | 0.21 | 664 | 0.68 | 0.27 | 667 | 0.65 | 0.19 | 649 | 0.28 | 0.17 |
| 90 | 4280, -610, 40 | 662 | 0.69 | 0.12 | 654 | 0.66 | 0.21 | 658 | 0.64 | 0.24 | 674 | 0.62 | 0.18 | 662 | 0.56 | 0.17 | 657 | 0.24 | 0.19 |
| 91 | 4440, -610, 40 | 686 | 0.70 | 0.21 | 648 | 0.68 | 0.27 | 655 | 0.67 | 0.22 | 633 | 0.66 | 0.21 | 671 | 0.63 | 0.17 | 657 | 0.24 | 0.18 |
| 92 | 5400, -610, 0 | 672 | 0.70 | 0.18 | 654 | 0.67 | 0.21 | 672 | 0.66 | 0.17 | 678 | 0.63 | 0.21 | 680 | 0.56 | 0.20 | 648 | 0.26 | 0.20 |
| 93 | 5560, -610, 0 | 664 | 0.68 | 0.18 | 662 | 0.84 | 0.23 | 657 | 0.67 | 0.23 | 674 | 0.62 | 0.26 | 644 | 0.64 | 0.23 | 656 | 0.28 | 0.19 |
| 94 | 6040, -610, 0 | 668 | 0.69 | 0.20 | 661 | 0.68 | 0.23 | 646 | 0.67 | 0.22 | 644 | 0.61 | 0.21 | 658 | 0.65 | 0.22 | 681 | 0.28 | 0.18 |
| 95 | 6200, -610, 0 | 664 | 0.68 | 0.21 | 629 | 0.67 | 0.22 | 699 | 0.62 | 0.23 | 674 | 0.67 | 0.22 | 655 | 0.68 | 0.22 | 668 | 0.22 | 0.21 |
| 96 | -7500, -610, 40 | 645 | 0.64 | 0.21 | 705 | 0.71 | 0.19 | 680 | 0.65 | 0.22 | 649 | 0.67 | 0.19 | 664 | 0.64 | 0.20 | 675 | 0.24 | 0.19 |
| 97 | -7660, -610, 40 | 649 | 0.65 | 0.22 | 654 | 0.63 | 0.20 | 670 | 0.63 | 0.19 | 659 | 0.62 | 0.18 | 639 | 0.62 | 0.20 | 653 | 0.27 | 0.19 |
| 98 | -7820, -610, 40 | 668 | 0.70 | 0.20 | 642 | 0.63 | 0.18 | 680 | 0.70 | 0.22 | 648 | 0.67 | 0.16 | 641 | 0.60 | 0.22 | 649 | 0.27 | 0.18 |
| 99 | -7980, -610, 40 | 648 | 0.65 | 0.21 | 657 | 0.64 | 0.22 | 682 | 0.67 | 0.18 | 651 | 0.68 | 0.22 | 676 | 0.64 | 0.21 | 679 | 0.26 | 0.20 |
| 100 | -8140, -610, 40 | 624 | 0.67 | 0.24 | 692 | 0.75 | 0.19 | 649 | 0.67 | 0.21 | 665 | 0.63 | 0.16 | 649 | 0.59 | 0.18 | 670 | 0.21 | 0.19 |
| 101 | -8300, -610, 40 | 653 | 0.63 | 0.22 | 646 | 0.76 | 0.20 | 667 | 0.63 | 0.17 | 658 | 0.73 | 0.25 | 666 | 0.63 | 0.22 | 663 | 0.26 | 0.20 |
| **Mean** |  | 662 | 0.66 | 0.21 | 660 | 0.65 | 0.21 | 664 | 0.66 | 0.21 | 662 | 0.65 | 0.21 | 663 | 0.64 | 0.22 | 661 | 0.25 | 0.19 |
