# Supplementary material for: Microgravity experiments confirm densest stable hard sphere crystal is most symmetric
Source: Research Square preprint supplement (doi:10.21203/rs.3.rs-8536211/v1), 2026-02-06
Supplement: Supplementary file 3 [file c3d922d48baf3efb1a3ed6ae.docx]

**Table2. Sample C3. Z-stacks featuring four successive hexagonal planes.** The following datasets for particles in pairs of images of four successive hexagonal planes, 1&2, 1&3, 2&3, 2&4, 3&4 and 1&4, are presented for each stack: Coordinates X,Y,Z of the center of the stack top image; the number of particles in the first image for which the separation 𝛿 between nearby projections on the X-Y plane of particle centers in the listed pair are laying respectively within and ; and the mean value and standard deviation of the minimum separation between midpoints of these linked particle centers in the listed pair.

| **Stack No.** | **X,Y,Z**  **coordinates,**  **μm** | **Images 1-2** | | | | | | **Images 1-3** | | | | | | **Images 2-3** | | | | | | **Images 2-4** | | | | | | **Images 3-4** | | | | | | **Images 1-4** | | | | | | |
| --- | --- | --- | --- | --- | --- | --- | --- | --- | --- | --- | --- | --- | --- | --- | --- | --- | --- | --- | --- | --- | --- | --- | --- | --- | --- | --- | --- | --- | --- | --- | --- | --- | --- | --- | --- | --- | --- | --- |
| **δ in 0-0.25 μm** | | | **δ in 1.0-1.5 μm** | | | **δ in 0-0.25 μm** | | | **δ in 1.0-1.5 μm** | | | **δ in 0-0.25 μm** | | | **δ in 1.0-1.5 μm** | | | **δ in 0-0.25 μm** | | | **δ in 1.0-1.5 μm** | | | **δ in 0-0.25 μm** | | | **δ in 1.0-1.5 μm** | | | **δ in 0-0.25 μm** | | | **δ in 1.0-1.5 μm** | | | |
| **N** | **Mean,**  **∆, μm** | **s.d.,**  **μm** | **N** | **Mean,**  **∆, μm** | **s.d.,**  **μm** | **N** | **Mean,**  **∆, μm** | **s.d.,**  **μm** | **N** | **Mean,**  **∆, μm** | **s.d.,**  **μm** | **N** | **Mean,**  **∆, μm** | **s.d.,**  **μm** | **N** | **Mean,**  **∆, μm** | **s.d.,**  **μm** | **N** | **Mean,**  **∆, μm** | **s.d.,**  **μm** | **N** | **Mean,**  **∆, μm** | **s.d.,**  **μm** | **N** | **Mean,**  **∆, μm** | **s.d.,**  **μm** | **N** | **Mean,**  **∆, μm** | **s.d.,**  **μm** | **N** | **Mean,**  **∆, μm** | **s.d.,**  **μm** | | **N** | **Mean,**  **∆, μm** | **s.d.,**  **μm** |
| 1 | -8902, 0, 20 | 37 | 2.92 | 1.86 | 14 | 5.60 | 4.51 | 13 | 3.61 | 1.62 | 11 | 6.79 | 4.36 | 37 | 2.70 | 1.83 | 19 | 5.95 | 2.98 | 32 | 2.66 | 0.94 | 15 | 6.70 | 2.99 | 22 | 3.57 | 2.71 | 14 | 5.66 | 3.83 | 328 | 1.36 | 0.28 | | 4 | 5.39 | 2.44 |
| 2 | 97, 0, 5 | 32 | 2.85 | 1.79 | 17 | 4.48 | 2.51 | 16 | 5.26 | 2.70 | 20 | 4.59 | 2.22 | 16 | 4.94 | 2.98 | 24 | 4.05 | 2.25 | 37 | 2.78 | 1.73 | 25 | 3.71 | 1.51 | 73 | 2.98 | 2.12 | 22 | 6.43 | 3.06 | 414 | 1.23 | 0.36 | | 6 | 10.22 | 3.26 |
| 3 | -550, -250, 5 | 10 | 2.16 | 1.72 | 18 | 3.95 | 1.90 | 18 | 5.37 | 3.69 | 17 | 5.16 | 2.61 | 25 | 3.28 | 2.35 | 16 | 5.93 | 2.73 | 54 | 13.58 | 6.62 | 12 | 6.96 | 3.64 | 51 | 3.08 | 2.47 | 24 | 6.13 | 2.85 | 427 | 1.24 | 0.37 | | 8 | 10.14 | 6.08 |
| 4 | 800, -250, 5 | 78 | 2.89 | 0.98 | 24 | 3.89 | 1.81 | 36 | 2.68 | 1.85 | 15 | 5.31 | 3.45 | 52 | 2.22 | 1.17 | 25 | 3.49 | 1.79 | 14 | 5.82 | 3.55 | 21 | 3.91 | 2.28 | 37 | 4.31 | 3.50 | 22 | 5.89 | 3.77 | 385 | 1.24 | 0.41 | | 7 | 7.72 | 1.94 |
| 5 | 1100, -250, 25 | 79 | 2.08 | 1.19 | 20 | 5.29 | 2.56 | 23 | 10.18 | 4.64 | 10 | 6.06 | 2.85 | 20 | 4.38 | 2.09 | 24 | 3.77 | 1.87 | 62 | 2.77 | 1.02 | 18 | 4.91 | 2.10 | 21 | 5.10 | 2.17 | 16 | 5.54 | 3.11 | 315 | 1.26 | 0.50 | | 8 | 7.87 | 2.21 |
| 6 | -400, -250, 5 | 32 | 3.28 | 2.05 | 19 | 4.51 | 2.70 | 56 | 2.23 | 1.61 | 23 | 4.26 | 1.87 | 20 | 2.75 | 2.33 | 24 | 3.53 | 1.52 | 30 | 2.45 | 1.89 | 14 | 4.91 | 4.86 | 50 | 4.25 | 1.99 | 14 | 6.77 | 3.20 | 421 | 1.30 | 0.31 | | 6 | 10.60 | 6.45 |
| 7 | -8902, 0, 35 | 32 | 3.02 | 1.86 | 19 | 4.38 | 1.76 | 20 | 4.80 | 2.04 | 20 | 4.80 | 2.04 | 74 | 2.22 | 0.89 | 23 | 5.21 | 2.16 | 38 | 2.88 | 1.96 | 13 | 4.80 | 3.23 | 26 | 4.01 | 2.74 | 11 | 5.37 | 4.00 | 415 | 1.32 | 0.35 | | 8 | 7.89 | 4.32 |
| 8 | -9002, 0, 5 | 42 | 2.40 | 1.57 | 24 | 4.09 | 2.38 | 38 | 2.59 | 0.67 | 17 | 5.30 | 3.27 | 39 | 2.70 | 2.55 | 25 | 4.28 | 2.46 | 60 | 2.40 | 1.40 | 29 | 3.75 | 2.96 | 57 | 4.08 | 2.46 | 22 | 6.47 | 3.96 | 340 | 1.23 | 0.46 | | 9 | 5.64 | 4.05 |
| 9 | 1250, -250, 5 | 36 | 2.59 | 2.00 | 18 | 5.22 | 2.54 | 26 | 5.19 | 2.25 | 13 | 5.11 | 2.51 | 39 | 5.65 | 1.82 | 29 | 4.73 | 2.58 | 22 | 6.12 | 1.70 | 16 | 6.31 | 2.18 | 59 | 4.67 | 2.78 | 9 | 5.21 | 2.67 | 340 | 1.22 | 0.39 | | 12 | 6.30 | 3.42 |
| 10 | -1600, -280, 5 | 64 | 2.96 | 1.61 | 18 | 4.45 | 1.88 | 26 | 5.10 | 4.44 | 14 | 5.08 | 2.43 | 37 | 5.44 | 1.87 | 27 | 5.27 | 2.16 | 28 | 5.30 | 2.44 | 13 | 4.40 | 2.26 | 39 | 6.26 | 1.90 | 25 | 5.48 | 2.44 | 336 | 1.30 | 0.47 | | 9 | 9.63 | 5.46 |
| 11 | -2, 0, 80 | 52 | 2.93 | 1.24 | 22 | 4.64 | 3.46 | 42 | 2.89 | 0.88 | 20 | 5.03 | 3.49 | 40 | 5.97 | 1.81 | 26 | 5.02 | 2.03 | 49 | 5.10 | 2.81 | 26 | 6.00 | 1.77 | 26 | 4.39 | 2.34 | 23 | 6.23 | 3.53 | 453 | 1.29 | 0.34 | | 7 | 9.03 | 3.27 |
| 12 | -2, 0, 100 | 33 | 3.06 | 1.48 | 21 | 5.57 | 1.54 | 13 | 3.58 | 1.77 | 13 | 5.29 | 3.10 | 56 | 4.47 | 1.13 | 20 | 6.29 | 2.20 | 30 | 6.19 | 4.01 | 25 | 5.64 | 4.56 | 37 | 4.06 | 2.30 | 17 | 4.95 | 3.73 | 416 | 1.36 | 0.46 | | 9 | 10.16 | 1.59 |
| 13 | 97, 0, 60 | 38 | 2.92 | 0.91 | 18 | 4.10 | 2.88 | 28 | 5.87 | 2.82 | 16 | 6.17 | 2.41 | 24 | 4.71 | 1.70 | 20 | 5.86 | 2.37 | 32 | 5.26 | 3.99 | 13 | 5.71 | 3.32 | 68 | 3.24 | 1.39 | 24 | 5.84 | 3.34 | 461 | 1.33 | 0.38 | | 13 | 10.44 | 1.16 |
| 14 | -102, 0, 120 | 37 | 2.41 | 1.51 | 16 | 4.34 | 3.93 | 33 | 3.83 | 2.60 | 15 | 5.32 | 3.95 | 55 | 6.77 | 2.03 | 17 | 5.73 | 2.83 | 59 | 6.24 | 2.49 | 11 | 4.19 | 3.35 | 47 | 4.83 | 1.90 | 22 | 5.82 | 2.87 | 380 | 1.29 | 0.31 | | 10 | 5.67 | 3.52 |
| 15 | -102, 0, 150 | 39 | 2.26 | 1.72 | 13 | 5.49 | 2.07 | 21 | 3.27 | 0.36 | 15 | 5.12 | 2.58 | 54 | 5.98 | 2.90 | 22 | 4.48 | 1.56 | 46 | 7.52 | 1.05 | 17 | 3.01 | 2.89 | 43 | 4.22 | 3.10 | 21 | 5.69 | 4.22 | 380 | 1.27 | 0.47 | | 12 | 4.68 | 0.67 |
| 16 | 197, 0, 20 | 45 | 3.10 | 2.10 | 19 | 3.84 | 1.71 | 52 | 2.80 | 0.09 | 16 | 5.71 | 0.73 | 66 | 5.70 | 2.07 | 19 | 4.84 | 2.29 | 65 | 8.55 | 1.20 | 6 | 6.06 | 2.76 | 36 | 5.45 | 2.25 | 11 | 5.56 | 2.67 | 356 | 1.23 | 0.38 | | 8 | 9.02 | 6.28 |
| 17 | 197, 0, 35 | 55 | 2.83 | 1.84 | 19 | 4.95 | 4.21 | 45 | 3.46 | 0.47 | 17 | 5.33 | 3.35 | 36 | 3.83 | 1.76 | 21 | 5.70 | 2.44 | 44 | 5.54 | 2.50 | 13 | 7.08 | 1.42 | 32 | 3.24 | 2.41 | 7 | 5.30 | 3.44 | 382 | 1.25 | 0.50 | | 9 | 7.93 | 5.71 |
| 18 | -1300, -250, 5 | 28 | 2.83 | 1.19 | 19 | 4.39 | 2.45 | 35 | 5.02 | 2.80 | 24 | 5.17 | 2.70 | 46 | 5.57 | 2.55 | 25 | 3.86 | 2.16 | 40 | 6.12 | 2.88 | 19 | 7.28 | 2.61 | 23 | 3.37 | 2.81 | 20 | 4.86 | 3.23 | 391 | 1.30 | 0.49 | | 9 | 6.96 | 7.30 |
| 19 | -1800, -280, 0 | 18 | 2.86 | 2.01 | 20 | 3.64 | 1.60 | 24 | 3.83 | 2.22 | 19 | 5.96 | 3.16 | 19 | 3.50 | 2.18 | 28 | 4.69 | 2.36 | 33 | 5.61 | 2.88 | 10 | 5.52 | 2.94 | 12 | 3.00 | 2.67 | 22 | 6.81 | 3.56 | 406 | 1.33 | 0.32 | | 10 | 6.91 | 3.79 |
| 20 | -1150, -250, 5 | 74 | 3.15 | 1.64 | 17 | 4.95 | 2.54 | 54 | 5.92 | 1.44 | 17 | 5.87 | 2.77 | 16 | 4.57 | 2.77 | 19 | 4.51 | 2.28 | 49 | 8.76 | 3.96 | 13 | 5.69 | 2.72 | 22 | 5.04 | 2.66 | 14 | 5.54 | 4.11 | 458 | 1.23 | 0.44 | | 6 | 4.45 | 2.09 |
| 21 | -1000, -250, 5 | 48 | 2.41 | 1.63 | 20 | 5.33 | 2.36 | 32 | 8.31 | 2.29 | 19 | 6.13 | 4.02 | 41 | 5.10 | 0.81 | 24 | 4.04 | 2.11 | 56 | 2.81 | 1.37 | 25 | 4.35 | 3.73 | 14 | 3.83 | 1.69 | 11 | 6.74 | 3.14 | 399 | 1.24 | 0.33 | | 7 | 10.14 | 3.10 |
| 22 | -850, -250, 5 | 71 | 3.95 | 2.12 | 20 | 4.41 | 2.48 | 33 | 6.04 | 4.34 | 12 | 5.05 | 2.38 | 53 | 5.93 | 2.56 | 26 | 5.14 | 2.30 | 51 | 5.30 | 2.18 | 17 | 5.77 | 3.23 | 36 | 2.87 | 3.27 | 24 | 4.14 | 3.63 | 345 | 1.35 | 0.45 | | 9 | 6.83 | 7.61 |
| 23 | -1400, -280, 0 | 41 | 3.18 | 1.59 | 20 | 4.25 | 2.77 | 13 | 9.31 | 2.53 | 13 | 4.37 | 2.44 | 50 | 5.06 | 2.33 | 23 | 4.34 | 2.08 | 70 | 4.78 | 2.04 | 13 | 4.09 | 3.67 | 16 | 3.53 | 2.07 | 18 | 5.97 | 2.26 | 347 | 1.22 | 0.40 | | 11 | 4.87 | 6.01 |
| 24 | -700, -250, 5 | 48 | 2.98 | 1.18 | 19 | 4.05 | 2.97 | 19 | 5.39 | 1.16 | 14 | 5.13 | 3.21 | 40 | 4.65 | 1.82 | 23 | 3.32 | 1.73 | 27 | 5.61 | 0.60 | 21 | 5.31 | 2.39 | 50 | 3.55 | 2.98 | 20 | 6.70 | 3.72 | 383 | 1.27 | 0.37 | | 13 | 8.50 | 2.02 |
| 25 | -1200, -280, 0 | 41 | 3.08 | 1.14 | 20 | 5.09 | 1.33 | 28 | 3.93 | 0.50 | 17 | 5.13 | 3.24 | 36 | 4.74 | 1.08 | 18 | 4.27 | 2.19 | 40 | 5.59 | 1.45 | 17 | 5.36 | 3.39 | 43 | 4.70 | 2.94 | 9 | 6.68 | 2.48 | 311 | 1.25 | 0.43 | | 8 | 6.93 | 5.21 |
| 26 | -1000, -100, 0 | 49 | 2.10 | 1.27 | 18 | 4.42 | 1.66 | 37 | 6.65 | 3.56 | 12 | 5.04 | 1.73 | 39 | 4.52 | 2.03 | 19 | 4.31 | 2.14 | 39 | 5.31 | 2.55 | 24 | 5.12 | 3.24 | 12 | 4.14 | 2.46 | 22 | 5.46 | 3.69 | 355 | 1.30 | 0.27 | | 9 | 8.95 | 3.79 |
| 27 | -250, -250, 5 | 57 | 2.86 | 1.54 | 14 | 4.77 | 3.03 | 49 | 6.99 | 3.29 | 21 | 5.47 | 3.02 | 48 | 3.85 | 1.97 | 13 | 4.51 | 2.37 | 43 | 4.99 | 1.06 | 7 | 6.49 | 2.08 | 49 | 3.95 | 2.64 | 15 | 6.38 | 3.37 | 360 | 1.25 | 0.24 | | 5 | 9.35 | 4.91 |
| 28 | -1000, -500, 0 | 47 | 2.60 | 1.47 | 25 | 5.81 | 1.35 | 43 | 5.94 | 1.89 | 20 | 4.93 | 3.72 | 37 | 6.94 | 2.56 | 26 | 6.40 | 2.31 | 55 | 5.99 | 1.16 | 29 | 7.61 | 2.87 | 46 | 3.78 | 2.40 | 15 | 5.65 | 2.93 | 476 | 1.32 | 0.36 | | 9 | 5.71 | 2.82 |
| 29 | 0, -250, 5 | 25 | 2.41 | 1.91 | 22 | 4.03 | 3.04 | 49 | 3.36 | 1.51 | 18 | 4.65 | 3.15 | 34 | 5.12 | 2.36 | 24 | 4.56 | 2.15 | 59 | 8.98 | 2.47 | 18 | 4.87 | 3.56 | 23 | 4.78 | 2.75 | 19 | 6.45 | 3.65 | 366 | 1.28 | 0.22 | | 6 | 7.66 | 4.31 |
| 30 | 50, -250, 5 | 81 | 2.34 | 1.27 | 19 | 5.15 | 1.87 | 36 | 6.55 | 0.58 | 15 | 5.42 | 3.15 | 52 | 5.17 | 1.69 | 25 | 6.88 | 1.74 | 41 | 3.72 | 2.25 | 22 | 6.97 | 4.49 | 38 | 4.49 | 3.33 | 18 | 4.38 | 3.05 | 414 | 1.30 | 0.42 | | 5 | 7.98 | 7.08 |
| 31 | 200, -250, 5 | 64 | 2.41 | 1.80 | 19 | 3.63 | 2.03 | 16 | 5.23 | 3.30 | 16 | 5.67 | 2.80 | 71 | 3.21 | 1.43 | 28 | 4.80 | 2.13 | 34 | 5.04 | 2.56 | 12 | 5.78 | 3.39 | 11 | 2.96 | 2.51 | 18 | 6.37 | 3.57 | 356 | 1.26 | 0.34 | | 6 | 8.44 | 5.05 |
| 32 | 350, -250, 5 | 56 | 2.35 | 1.21 | 21 | 3.79 | 2.55 | 45 | 5.31 | 2.05 | 18 | 5.34 | 2.56 | 47 | 3.27 | 2.99 | 21 | 3.89 | 1.64 | 44 | 8.69 | 1.76 | 13 | 6.35 | 3.48 | 42 | 4.06 | 2.92 | 25 | 5.81 | 3.96 | 385 | 1.32 | 0.35 | | 13 | 7.49 | 5.38 |
| 33 | 500, -250, 5 | 44 | 2.22 | 1.74 | 21 | 5.10 | 1.85 | 14 | 10.28 | 2.87 | 16 | 5.49 | 3.18 | 21 | 6.89 | 2.19 | 21 | 2.35 | 3.01 | 40 | 6.39 | 2.55 | 22 | 5.03 | 2.94 | 23 | 2.76 | 3.18 | 18 | 6.25 | 4.40 | 281 | 1.27 | 0.34 | | 10 | 6.79 | 3.91 |
| 34 | 650, -250, 5 | 64 | 2.22 | 1.63 | 18 | 3.99 | 2.16 | 19 | 7.17 | 3.63 | 19 | 5.54 | 2.47 | 32 | 5.65 | 1.59 | 19 | 4.29 | 1.30 | 43 | 5.64 | 2.37 | 15 | 4.07 | 2.05 | 12 | 5.14 | 2.60 | 21 | 6.52 | 3.29 | 388 | 1.23 | 0.45 | | 3 | 8.68 | 5.31 |
| 35 | 950, -250, 5 | 18 | 2.98 | 1.84 | 21 | 4.67 | 2.75 | 67 | 5.70 | 3.58 | 16 | 4.67 | 3.79 | 47 | 5.79 | 2.32 | 14 | 4.84 | 2.15 | 30 | 3.14 | 1.38 | 12 | 5.65 | 2.72 | 34 | 3.35 | 2.55 | 18 | 5.91 | 2.97 | 410 | 1.25 | 0.28 | | 3 | 8.33 | 3.99 |
| 36 | 1400, -250, 5 | 53 | 2.79 | 1.67 | 21 | 4.24 | 2.62 | 53 | 2.30 | 0.30 | 16 | 4.37 | 2.58 | 58 | 5.93 | 2.18 | 22 | 4.31 | 2.12 | 55 | 5.38 | 2.54 | 8 | 4.80 | 2.33 | 17 | 5.51 | 2.96 | 19 | 7.15 | 3.25 | 454 | 1.14 | 0.31 | | 7 | 11.72 | 5.61 |
| 37 | 1550, -250, 5 | 34 | 2.58 | 2.04 | 16 | 5.44 | 2.99 | 14 | 4.77 | 3.73 | 14 | 4.75 | 3.23 | 16 | 5.60 | 2.38 | 24 | 3.66 | 1.58 | 56 | 3.31 | 1.66 | 30 | 5.51 | 3.16 | 32 | 4.09 | 2.36 | 16 | 4.91 | 4.00 | 407 | 1.32 | 0.44 | | 11 | 7.50 | 5.97 |
| 38 | 1700, -250, 5 | 64 | 2.29 | 2.21 | 18 | 3.67 | 3.76 | 28 | 6.48 | 3.74 | 16 | 5.86 | 3.93 | 45 | 6.25 | 3.01 | 22 | 4.43 | 2.88 | 52 | 3.41 | 0.59 | 11 | 5.48 | 3.92 | 26 | 2.98 | 1.17 | 18 | 5.68 | 3.25 | 331 | 1.26 | 0.43 | | 7 | 8.18 | 5.23 |
| 39 | 1850, -250, 5 | 37 | 3.20 | 1.96 | 23 | 3.80 | 2.83 | 33 | 4.26 | 2.77 | 21 | 4.51 | 3.14 | 38 | 8.14 | 2.12 | 22 | 4.39 | 2.16 | 42 | 8.73 | 3.49 | 14 | 5.36 | 1.93 | 31 | 4.05 | 2.04 | 20 | 5.75 | 3.43 | 375 | 1.31 | 0.53 | | 11 | 7.89 | 2.53 |
| 40 | 2150, -250, 5 | 53 | 2.59 | 1.67 | 22 | 5.29 | 2.17 | 30 | 12.52 | 3.32 | 16 | 6.07 | 3.30 | 44 | 3.69 | 1.81 | 23 | 5.41 | 2.29 | 27 | 5.17 | 1.17 | 14 | 4.65 | 2.32 | 57 | 6.96 | 2.74 | 18 | 5.61 | 2.24 | 443 | 1.37 | 0.16 | | 0 | 6.43 | 4.56 |
| 41 | 2300, -250, 5 | 42 | 2.70 | 1.14 | 22 | 5.01 | 2.55 | 33 | 5.66 | 1.85 | 23 | 5.56 | 3.23 | 37 | 5.73 | 2.12 | 23 | 6.08 | 1.87 | 47 | 5.93 | 3.61 | 14 | 6.28 | 3.43 | 52 | 2.22 | 2.18 | 27 | 3.44 | 2.93 | 392 | 1.32 | 0.41 | | 9 | 10.12 | 5.74 |
| 42 | 2450, -250, 5 | 19 | 2.73 | 2.02 | 16 | 4.75 | 2.56 | 15 | 7.97 | 1.44 | 16 | 5.23 | 3.24 | 12 | 3.14 | 1.97 | 18 | 4.62 | 2.26 | 48 | 4.93 | 2.21 | 11 | 4.94 | 1.54 | 34 | 3.10 | 2.45 | 22 | 6.26 | 3.20 | 434 | 1.25 | 0.47 | | 12 | 4.99 | 1.79 |
| 43 | 2600, -250, 5 | 29 | 2.62 | 1.72 | 20 | 4.82 | 2.62 | 29 | 6.24 | 3.58 | 20 | 4.75 | 1.76 | 52 | 5.31 | 2.49 | 23 | 3.45 | 1.89 | 60 | 12.05 | 1.78 | 13 | 7.90 | 2.66 | 47 | 3.46 | 3.04 | 21 | 5.33 | 3.44 | 415 | 1.32 | 0.34 | | 7 | 9.25 | 3.53 |
| 44 | 2750, -250, 5 | 55 | 2.51 | 1.69 | 14 | 4.82 | 3.18 | 55 | 3.84 | 0.74 | 17 | 5.85 | 3.69 | 36 | 3.82 | 0.93 | 26 | 6.17 | 1.74 | 53 | 8.35 | 4.57 | 11 | 4.73 | 1.58 | 36 | 4.00 | 2.10 | 21 | 4.46 | 3.32 | 328 | 1.37 | 0.26 | | 10 | 9.33 | 3.68 |
| 45 | 3050, -250, 5 | 24 | 3.14 | 1.21 | 14 | 5.71 | 1.79 | 18 | 5.40 | 2.66 | 15 | 5.05 | 3.47 | 40 | 4.09 | 2.10 | 20 | 2.85 | 1.64 | 51 | 13.18 | 2.78 | 15 | 5.57 | 3.24 | 49 | 4.31 | 2.46 | 17 | 5.31 | 2.94 | 453 | 1.40 | 0.42 | | 9 | 9.19 | 6.88 |
| 46 | 3200, -250, 5 | 33 | 2.40 | 2.05 | 21 | 4.83 | 3.51 | 27 | 6.53 | 0.81 | 15 | 5.70 | 2.84 | 41 | 6.03 | 2.86 | 20 | 4.54 | 2.26 | 48 | 6.58 | 0.89 | 13 | 5.39 | 1.67 | 41 | 4.74 | 2.59 | 17 | 6.44 | 3.82 | 385 | 1.26 | 0.36 | | 5 | 10.86 | 2.31 |
| 47 | 3350, -250, 5 | 33 | 2.66 | 1.74 | 16 | 3.92 | 3.25 | 35 | 6.89 | 3.38 | 19 | 5.95 | 2.81 | 34 | 8.99 | 0.95 | 25 | 3.91 | 2.45 | 51 | 4.35 | 2.82 | 18 | 5.08 | 2.38 | 36 | 4.67 | 2.74 | 25 | 5.30 | 3.67 | 332 | 1.33 | 0.28 | | 9 | 9.37 | 1.89 |
| 48 | 3500, -250, 5 | 70 | 2.45 | 2.36 | 19 | 4.58 | 2.33 | 19 | 4.08 | 2.89 | 15 | 6.14 | 3.66 | 56 | 3.29 | 1.46 | 25 | 3.15 | 1.96 | 60 | 2.48 | 0.98 | 13 | 2.90 | 1.73 | 58 | 3.84 | 2.83 | 27 | 4.76 | 2.76 | 419 | 1.28 | 0.42 | | 9 | 9.24 | 7.24 |
| 49 | 3650, -250, 5 | 17 | 2.48 | 1.35 | 14 | 5.24 | 3.05 | 37 | 4.56 | 3.51 | 20 | 4.26 | 2.41 | 30 | 4.67 | 2.66 | 23 | 3.93 | 2.28 | 46 | 6.02 | 2.51 | 25 | 4.31 | 3.11 | 42 | 2.58 | 1.91 | 21 | 5.63 | 4.19 | 454 | 1.31 | 0.40 | | 7 | 8.44 | 5.30 |
| 50 | 3800, -250, 5 | 37 | 2.71 | 1.37 | 21 | 4.53 | 0.47 | 17 | 5.33 | 1.87 | 23 | 5.24 | 2.51 | 29 | 5.02 | 2.09 | 15 | 5.03 | 2.11 | 24 | 9.58 | 5.66 | 16 | 6.02 | 1.30 | 34 | 3.57 | 2.42 | 19 | 7.24 | 2.80 | 344 | 1.26 | 0.42 | | 0 | 6.08 | 5.68 |
| 51 | 3950, -250, 5 | 34 | 2.70 | 1.18 | 22 | 4.51 | 1.21 | 17 | 5.71 | 2.35 | 17 | 4.18 | 3.00 | 29 | 6.70 | 2.07 | 26 | 3.34 | 3.08 | 47 | 6.37 | 2.53 | 20 | 4.55 | 2.14 | 50 | 4.36 | 2.04 | 11 | 4.86 | 3.68 | 399 | 1.34 | 0.43 | | 12 | 7.49 | 5.43 |
| 52 | 4100, -250, 5 | 53 | 2.73 | 1.37 | 25 | 3.90 | 1.32 | 36 | 5.26 | 2.55 | 23 | 5.57 | 3.43 | 40 | 3.07 | 2.52 | 26 | 2.66 | 1.84 | 28 | 2.29 | 0.40 | 22 | 6.93 | 3.43 | 71 | 5.39 | 2.09 | 20 | 6.34 | 3.46 | 310 | 1.30 | 0.34 | | 11 | 8.36 | 4.31 |
| 53 | 4250, -250, 5 | 29 | 2.49 | 1.74 | 19 | 4.56 | 3.54 | 22 | 7.86 | 2.40 | 11 | 5.14 | 3.32 | 35 | 3.41 | 1.50 | 17 | 4.77 | 2.03 | 59 | 4.25 | 1.29 | 9 | 3.90 | 2.30 | 13 | 2.66 | 3.26 | 21 | 5.40 | 3.60 | 382 | 1.29 | 0.44 | | 6 | 9.53 | 4.17 |
| 54 | 4440, -250, 5 | 6 | 2.56 | 1.75 | 24 | 4.25 | 1.86 | 33 | 5.72 | 2.20 | 11 | 4.69 | 3.65 | 42 | 3.29 | 2.08 | 20 | 3.78 | 1.37 | 50 | 5.12 | 0.39 | 12 | 6.70 | 2.06 | 57 | 5.04 | 2.98 | 26 | 4.87 | 3.37 | 319 | 1.34 | 0.39 | | 11 | 7.12 | 3.30 |
| 55 | 4550, -250, 5 | 46 | 2.84 | 1.70 | 18 | 4.96 | 2.05 | 26 | 5.90 | 1.07 | 10 | 4.83 | 2.29 | 24 | 3.56 | 2.37 | 19 | 5.70 | 2.01 | 24 | 5.42 | 0.09 | 18 | 5.34 | 3.07 | 50 | 4.48 | 2.66 | 17 | 6.68 | 3.34 | 370 | 1.25 | 0.49 | | 8 | 5.93 | 4.74 |
| 56 | 5000, -250, 5 | 23 | 3.05 | 1.55 | 24 | 4.39 | 2.15 | 21 | 4.10 | 2.46 | 13 | 4.51 | 2.07 | 59 | 3.78 | 1.23 | 20 | 3.48 | 2.75 | 50 | 6.76 | 4.90 | 10 | 4.76 | 3.02 | 35 | 2.89 | 1.66 | 24 | 5.43 | 3.69 | 333 | 1.24 | 0.38 | | 8 | 10.92 | 4.95 |
| 57 | 5150, -250, 5 | 31 | 2.95 | 1.87 | 23 | 4.47 | 3.07 | 17 | 6.00 | 2.61 | 19 | 5.35 | 3.05 | 36 | 4.29 | 2.42 | 19 | 4.71 | 2.72 | 54 | 6.29 | 4.51 | 22 | 5.73 | 1.73 | 22 | 6.64 | 2.76 | 15 | 6.62 | 3.68 | 447 | 1.30 | 0.55 | | 9 | 8.65 | 3.24 |
| 58 | 5300, -250, 5 | 39 | 2.74 | 1.45 | 19 | 5.64 | 2.22 | 63 | 8.44 | 1.58 | 14 | 5.21 | 3.27 | 39 | 5.33 | 1.39 | 22 | 4.04 | 2.54 | 41 | 12.01 | 1.59 | 28 | 5.95 | 4.64 | 31 | 3.32 | 1.74 | 18 | 4.99 | 2.67 | 405 | 1.35 | 0.43 | | 12 | 9.31 | 7.61 |
| 59 | 5600, -250, 5 | 57 | 2.32 | 1.09 | 25 | 4.32 | 3.72 | 28 | 5.94 | 3.06 | 23 | 5.17 | 2.64 | 26 | 3.47 | 0.85 | 17 | 5.02 | 2.34 | 30 | 3.29 | 2.86 | 13 | 5.36 | 4.23 | 33 | 7.31 | 2.36 | 20 | 6.81 | 3.56 | 364 | 1.29 | 0.47 | | 13 | 4.85 | 3.38 |
| 60 | 9800, -250, 5 | 14 | 3.14 | 1.80 | 17 | 4.05 | 2.46 | 33 | 5.87 | 2.52 | 18 | 4.88 | 3.65 | 24 | 4.21 | 1.63 | 22 | 3.11 | 2.35 | 58 | 7.79 | 3.34 | 24 | 5.86 | 2.58 | 31 | 4.21 | 2.67 | 22 | 4.67 | 2.97 | 422 | 1.30 | 0.44 | | 8 | 6.39 | 6.92 |
| 61 | 9950, -250, 5 | 39 | 2.47 | 1.68 | 14 | 5.00 | 2.02 | 34 | 7.00 | 3.43 | 25 | 4.87 | 4.66 | 36 | 3.11 | 1.55 | 26 | 5.92 | 3.31 | 20 | 8.92 | 4.32 | 23 | 7.18 | 1.81 | 65 | 3.59 | 2.90 | 23 | 5.87 | 2.83 | 381 | 1.31 | 0.40 | | 9 | 8.81 | 3.32 |
| 62 | 10100, -250, 5 | 14 | 2.43 | 1.72 | 21 | 4.76 | 2.56 | 27 | 6.19 | 4.44 | 19 | 5.36 | 2.81 | 49 | 3.11 | 1.45 | 28 | 3.62 | 3.60 | 17 | 8.14 | 3.38 | 21 | 4.49 | 1.48 | 47 | 6.55 | 1.60 | 22 | 5.48 | 2.23 | 421 | 1.22 | 0.37 | | 9 | 11.68 | 4.95 |
| 63 | 10400, -250, 5 | 66 | 2.97 | 1.10 | 22 | 4.80 | 2.24 | 45 | 6.90 | 2.82 | 17 | 3.98 | 3.01 | 33 | 5.72 | 2.32 | 23 | 3.94 | 0.97 | 36 | 9.19 | 2.89 | 14 | 4.57 | 2.58 | 67 | 4.81 | 2.76 | 20 | 6.08 | 3.22 | 382 | 1.28 | 0.26 | | 9 | 7.75 | 2.31 |
| 64 | 10550, -250, 5 | 42 | 3.20 | 1.81 | 20 | 4.80 | 4.00 | 47 | 3.91 | 1.37 | 13 | 5.02 | 0.88 | 35 | 3.72 | 1.24 | 24 | 3.32 | 1.46 | 39 | 5.66 | 3.92 | 18 | 4.35 | 1.66 | 22 | 4.25 | 2.52 | 19 | 6.21 | 3.54 | 452 | 1.29 | 0.40 | | 12 | 7.69 | 5.06 |
| 65 | 10700, -250, 5 | 44 | 2.69 | 2.02 | 23 | 4.03 | 2.82 | 23 | 10.17 | 3.00 | 10 | 4.99 | 2.98 | 27 | 6.00 | 2.70 | 26 | 5.32 | 2.61 | 31 | 9.22 | 1.59 | 14 | 5.08 | 3.15 | 42 | 5.61 | 2.64 | 18 | 5.41 | 2.88 | 368 | 1.20 | 0.48 | | 12 | 13.15 | 2.94 |
| 66 | 10850, -250, 5 | 51 | 2.52 | 1.44 | 23 | 4.45 | 1.23 | 25 | 5.46 | 2.51 | 16 | 5.67 | 0.61 | 46 | 4.26 | 2.52 | 25 | 5.75 | 1.72 | 48 | 6.44 | 2.71 | 24 | 3.26 | 1.14 | 30 | 3.72 | 2.42 | 14 | 5.52 | 3.22 | 364 | 1.26 | 0.45 | | 10 | 8.29 | 4.44 |
| 67 | 11150, -250, 5 | 24 | 2.02 | 1.10 | 19 | 5.13 | 2.26 | 27 | 5.12 | 4.43 | 18 | 5.11 | 0.99 | 56 | 2.69 | 1.50 | 22 | 3.95 | 3.39 | 46 | 4.84 | 2.63 | 18 | 3.82 | 2.80 | 12 | 3.90 | 2.06 | 16 | 5.94 | 2.64 | 366 | 1.25 | 0.31 | | 10 | 7.96 | 5.18 |
| 68 | 11300, -250, 5 | 36 | 2.48 | 1.76 | 23 | 3.75 | 2.26 | 40 | 3.88 | 1.38 | 21 | 4.52 | 2.94 | 47 | 3.94 | 0.69 | 22 | 6.07 | 2.04 | 21 | 6.28 | 2.58 | 12 | 5.39 | 2.64 | 62 | 2.88 | 2.05 | 17 | 5.56 | 3.33 | 367 | 1.37 | 0.32 | | 7 | 6.54 | 3.65 |
| 69 | 11600, -250, 5 | 52 | 2.73 | 1.85 | 18 | 4.81 | 4.10 | 34 | 3.43 | 2.81 | 20 | 5.37 | 2.79 | 57 | 5.73 | 1.78 | 27 | 4.49 | 2.26 | 59 | 5.36 | 2.60 | 13 | 8.50 | 2.39 | 43 | 3.34 | 2.72 | 19 | 7.57 | 3.15 | 369 | 1.21 | 0.36 | | 10 | 9.15 | 3.02 |
| 70 | 11900, -250, 5 | 55 | 3.09 | 1.81 | 21 | 4.54 | 2.57 | 27 | 3.43 | 2.19 | 23 | 5.48 | 3.24 | 55 | 3.55 | 1.51 | 23 | 5.59 | 2.66 | 45 | 7.55 | 2.25 | 15 | 3.66 | 3.04 | 11 | 5.71 | 2.65 | 21 | 5.42 | 2.02 | 306 | 1.25 | 0.40 | | 10 | 8.71 | 3.14 |

| 71 | 12050, -250, 5 | 43 | 2.83 | 1.29 | 20 | 3.60 | 1.41 | 31 | 5.02 | 1.04 | 15 | 5.33 | 2.82 | 23 | 4.76 | 1.43 | 21 | 3.84 | 1.61 | 48 | 10.71 | 1.81 | 15 | 5.34 | 1.27 | 48 | 5.60 | 2.90 | 27 | 6.41 | 2.91 | 313 | 1.30 | 0.45 | 8 | 7.18 | 5.57 |
| --- | --- | --- | --- | --- | --- | --- | --- | --- | --- | --- | --- | --- | --- | --- | --- | --- | --- | --- | --- | --- | --- | --- | --- | --- | --- | --- | --- | --- | --- | --- | --- | --- | --- | --- | --- | --- | --- |
| 72 | 12200, -250, 5 | 59 | 2.68 | 1.47 | 18 | 4.06 | 2.66 | 37 | 5.75 | 2.01 | 16 | 5.07 | 3.85 | 44 | 3.80 | 2.28 | 16 | 4.60 | 1.62 | 33 | 8.08 | 3.68 | 27 | 4.62 | 3.26 | 7 | 3.39 | 2.26 | 17 | 5.14 | 3.35 | 400 | 1.31 | 0.25 | 5 | 7.19 | 5.53 |
| 73 | 12500, -250, 5 | 27 | 2.89 | 1.23 | 14 | 4.32 | 2.56 | 41 | 5.98 | 2.91 | 26 | 4.86 | 2.33 | 31 | 6.41 | 2.14 | 23 | 3.40 | 2.21 | 39 | 5.21 | 3.41 | 19 | 5.11 | 2.63 | 31 | 2.98 | 3.14 | 19 | 4.56 | 3.56 | 426 | 1.27 | 0.35 | 7 | 8.67 | 3.65 |
| 74 | 12650, -250, 5 | 78 | 3.23 | 1.81 | 16 | 4.79 | 1.85 | 47 | 6.39 | 1.90 | 13 | 5.62 | 1.90 | 5 | 3.61 | 1.27 | 34 | 4.20 | 2.03 | 17 | 4.63 | 2.68 | 17 | 5.74 | 3.78 | 39 | 4.65 | 2.54 | 20 | 5.41 | 3.07 | 424 | 1.34 | 0.37 | 8 | 9.85 | 3.87 |
| 75 | 12800, -250, 5 | 34 | 3.22 | 2.48 | 18 | 3.77 | 3.43 | 31 | 3.77 | 0.92 | 14 | 4.61 | 2.51 | 50 | 2.52 | 1.33 | 30 | 5.30 | 2.09 | 11 | 5.85 | 0.26 | 15 | 5.02 | 2.82 | 30 | 3.96 | 2.52 | 22 | 5.57 | 2.20 | 360 | 1.33 | 0.34 | 8 | 6.24 | 3.77 |
| 76 | 12950, -250, 5 | 45 | 3.18 | 1.60 | 18 | 4.32 | 1.65 | 13 | 4.77 | 3.90 | 13 | 4.84 | 1.88 | 44 | 3.30 | 2.35 | 11 | 5.88 | 2.63 | 59 | 10.87 | 0.58 | 15 | 4.55 | 2.60 | 43 | 3.50 | 3.34 | 16 | 5.05 | 2.78 | 321 | 1.24 | 0.36 | 9 | 9.29 | 3.99 |
| 77 | 13250, -250, 5 | 45 | 2.84 | 1.22 | 16 | 4.71 | 3.32 | 30 | 6.90 | 2.61 | 16 | 5.78 | 2.77 | 46 | 5.69 | 2.54 | 24 | 3.49 | 1.90 | 69 | 8.29 | 2.76 | 15 | 6.50 | 3.10 | 45 | 1.36 | 2.53 | 19 | 6.49 | 3.73 | 404 | 1.32 | 0.44 | 10 | 7.08 | 4.99 |
| 78 | 13400, -250, 5 | 26 | 3.36 | 1.28 | 21 | 4.07 | 3.47 | 36 | 5.36 | 0.70 | 13 | 4.75 | 3.69 | 52 | 4.96 | 1.34 | 22 | 5.15 | 1.72 | 35 | 3.82 | 1.57 | 24 | 4.11 | 2.32 | 28 | 5.58 | 3.14 | 15 | 4.39 | 3.56 | 408 | 1.33 | 0.33 | 8 | 6.46 | 3.62 |
| 79 | 13550, -250, 5 | 49 | 3.03 | 1.09 | 20 | 3.53 | 3.37 | 21 | 6.33 | 2.17 | 27 | 4.55 | 2.46 | 30 | 5.71 | 1.05 | 24 | 4.29 | 2.16 | 29 | 6.92 | 2.54 | 24 | 5.79 | 2.51 | 37 | 2.53 | 2.53 | 18 | 5.78 | 3.87 | 431 | 1.37 | 0.30 | 6 | 5.75 | 2.59 |
| 80 | 3400, -610, 0 | 21 | 3.15 | 1.02 | 15 | 3.62 | 4.38 | 49 | 5.16 | 3.58 | 15 | 4.95 | 2.61 | 16 | 3.44 | 2.92 | 19 | 5.15 | 2.10 | 14 | 6.36 | 2.69 | 24 | 2.71 | 0.84 | 54 | 4.76 | 1.99 | 27 | 5.32 | 2.72 | 434 | 1.26 | 0.36 | 6 | 12.81 | 2.40 |
| 81 | 3600, -610, 0 | 53 | 2.66 | 1.37 | 22 | 4.07 | 3.43 | 19 | 6.39 | 2.74 | 17 | 5.49 | 2.45 | 36 | 3.25 | 1.28 | 13 | 2.88 | 2.68 | 10 | 5.37 | 0.15 | 20 | 4.93 | 3.75 | 21 | 5.99 | 2.02 | 23 | 7.61 | 2.96 | 410 | 1.29 | 0.37 | 4 | 7.36 | 4.46 |
| 82 | -3700, -610, 0 | 93 | 3.06 | 1.35 | 19 | 4.60 | 2.36 | 44 | 5.36 | 2.32 | 21 | 5.73 | 2.46 | 44 | 3.81 | 0.64 | 22 | 5.35 | 2.04 | 18 | 6.58 | 0.73 | 7 | 4.99 | 1.09 | 38 | 4.74 | 2.93 | 23 | 4.51 | 2.76 | 372 | 1.33 | 0.30 | 9 | 10.12 | 8.33 |
| 83 | 3800, -610, 0 | 53 | 2.15 | 1.42 | 15 | 4.30 | 2.43 | 41 | 2.42 | 0.99 | 10 | 4.80 | 3.81 | 17 | 6.45 | 2.93 | 19 | 3.79 | 2.28 | 41 | 6.92 | 3.07 | 28 | 3.61 | 2.03 | 12 | 3.55 | 1.70 | 21 | 5.38 | 3.75 | 297 | 1.22 | 0.37 | 7 | 7.69 | 4.84 |
| 84 | -3900, -610, 0 | 54 | 2.81 | 1.63 | 15 | 4.23 | 3.45 | 25 | 6.49 | 2.51 | 23 | 4.85 | 2.06 | 27 | 4.60 | 2.10 | 26 | 4.02 | 2.21 | 41 | 9.53 | 2.27 | 15 | 2.82 | 1.36 | 20 | 3.35 | 3.02 | 13 | 5.52 | 2.82 | 352 | 1.28 | 0.48 | 5 | 10.25 | 4.68 |
| 85 | 8800, -610, 0 | 38 | 2.75 | 1.80 | 19 | 4.56 | 2.83 | 18 | 6.21 | 3.01 | 20 | 5.27 | 3.02 | 54 | 6.95 | 1.34 | 32 | 3.88 | 2.06 | 21 | 6.77 | 3.81 | 20 | 3.89 | 0.54 | 39 | 4.76 | 2.71 | 11 | 5.85 | 2.89 | 308 | 1.26 | 0.35 | 8 | 7.71 | 2.90 |
| 86 | 13000, -610, 0 | 16 | 2.23 | 1.66 | 22 | 4.97 | 1.30 | 35 | 4.72 | 0.89 | 20 | 4.56 | 2.59 | 58 | 5.27 | 3.07 | 19 | 5.51 | 1.91 | 44 | 5.29 | 1.81 | 21 | 4.01 | 2.56 | 47 | 4.96 | 2.74 | 17 | 4.92 | 3.23 | 505 | 1.29 | 0.37 | 14 | 8.96 | 4.35 |
| 87 | 13200, -610, 0 | 39 | 3.97 | 1.12 | 19 | 4.35 | 2.72 | 5 | 5.92 | 1.80 | 24 | 5.35 | 4.12 | 45 | 6.57 | 3.67 | 25 | 3.70 | 2.76 | 46 | 2.92 | 1.29 | 28 | 6.56 | 1.82 | 25 | 4.73 | 2.17 | 24 | 5.67 | 3.86 | 366 | 1.34 | 0.27 | 8 | 9.21 | 2.91 |
| 88 | 3960, -610, 40 | 15 | 2.61 | 1.98 | 16 | 4.75 | 4.04 | 40 | 5.51 | 3.50 | 16 | 4.64 | 2.79 | 43 | 4.55 | 1.65 | 26 | 5.26 | 1.70 | 69 | 5.46 | 3.62 | 11 | 4.47 | 3.34 | 20 | 4.11 | 2.97 | 19 | 6.23 | 3.76 | 420 | 1.23 | 0.41 | 9 | 6.97 | 5.51 |
| 89 | 4120, -610, 40 | 30 | 2.42 | 1.52 | 23 | 4.56 | 2.57 | 34 | 2.74 | 1.42 | 11 | 5.42 | 2.98 | 32 | 3.08 | 1.76 | 17 | 4.63 | 2.30 | 44 | 5.46 | 1.36 | 15 | 4.47 | 2.10 | 23 | 4.17 | 2.63 | 23 | 5.23 | 3.26 | 386 | 1.24 | 0.40 | 3 | 8.07 | 2.33 |
| 90 | 4280, -610, 40 | 34 | 2.65 | 1.83 | 16 | 4.65 | 3.18 | 33 | 6.71 | 3.20 | 11 | 4.34 | 2.78 | 33 | 3.41 | 1.25 | 21 | 6.47 | 2.15 | 23 | 5.30 | 2.98 | 9 | 4.53 | 2.79 | 30 | 4.35 | 3.29 | 24 | 6.39 | 3.98 | 340 | 1.35 | 0.36 | 6 | 10.23 | 4.59 |
| 91 | 4440, -610, 40 | 59 | 2.72 | 1.82 | 18 | 4.84 | 3.56 | 29 | 4.07 | 1.13 | 10 | 5.10 | 4.44 | 6 | 6.82 | 1.32 | 15 | 3.56 | 2.28 | 43 | 11.05 | 2.79 | 23 | 6.59 | 3.86 | 29 | 4.11 | 1.89 | 20 | 4.97 | 2.87 | 351 | 1.21 | 0.44 | 11 | 6.32 | 3.99 |
| 92 | 5400, -610, 0 | 43 | 2.59 | 1.68 | 20 | 5.22 | 1.99 | 36 | 4.49 | 0.12 | 18 | 5.12 | 1.62 | 49 | 5.94 | 2.90 | 16 | 4.98 | 2.37 | 57 | 5.26 | 4.39 | 20 | 3.97 | 1.71 | 10 | 3.31 | 2.29 | 13 | 5.76 | 3.11 | 469 | 1.25 | 0.23 | 6 | 9.28 | 6.59 |
| 93 | 5560, -610, 0 | 40 | 2.74 | 1.41 | 24 | 5.11 | 2.39 | 63 | 9.33 | 1.90 | 11 | 5.70 | 4.99 | 34 | 5.64 | 3.62 | 12 | 5.96 | 2.82 | 49 | 7.16 | 2.44 | 18 | 6.19 | 2.79 | 53 | 2.07 | 2.67 | 18 | 6.09 | 3.35 | 305 | 1.26 | 0.35 | 4 | 9.05 | 5.77 |
| 94 | 6040, -610, 0 | 17 | 2.64 | 1.99 | 18 | 4.75 | 2.54 | 37 | 5.66 | 2.87 | 15 | 5.13 | 2.27 | 82 | 3.22 | 1.86 | 16 | 3.41 | 2.73 | 45 | 6.72 | 3.72 | 21 | 5.80 | 3.33 | 57 | 4.67 | 2.94 | 17 | 6.02 | 3.69 | 410 | 1.22 | 0.41 | 11 | 7.57 | 3.98 |
| 95 | 6200, -610, 0 | 18 | 2.47 | 1.45 | 16 | 3.88 | 2.99 | 19 | 12.41 | 4.70 | 19 | 5.07 | 1.99 | 59 | 3.84 | 1.56 | 24 | 6.49 | 1.86 | 44 | 6.65 | 1.63 | 14 | 4.66 | 3.65 | 30 | 3.86 | 3.61 | 16 | 5.62 | 3.50 | 410 | 1.26 | 0.48 | 8 | 8.86 | 5.10 |
| 96 | -7500, -610, 40 | 50 | 3.05 | 2.46 | 19 | 4.65 | 2.80 | 47 | 3.16 | 2.43 | 21 | 4.20 | 3.40 | 36 | 5.87 | 2.77 | 21 | 6.18 | 1.36 | 48 | 6.02 | 3.47 | 25 | 2.96 | 0.79 | 47 | 4.74 | 1.25 | 24 | 5.73 | 2.47 | 348 | 1.29 | 0.34 | 6 | 6.15 | 3.48 |
| 97 | -7660, -610, 40 | 64 | 2.73 | 1.27 | 17 | 4.04 | 2.24 | 40 | 4.16 | 1.40 | 16 | 5.60 | 3.38 | 20 | 4.18 | 3.28 | 14 | 4.27 | 2.52 | 28 | 4.30 | 3.12 | 20 | 6.58 | 0.71 | 34 | 3.95 | 2.52 | 21 | 4.69 | 3.00 | 355 | 1.30 | 0.30 | 7 | 6.39 | 6.83 |
| 98 | -7820, -610, 40 | 16 | 2.74 | 1.72 | 18 | 5.50 | 4.68 | 33 | 5.07 | 1.82 | 29 | 4.65 | 4.03 | 65 | 3.86 | 2.96 | 15 | 4.32 | 2.06 | 28 | 6.68 | 2.69 | 12 | 6.81 | 2.99 | 25 | 3.21 | 2.55 | 23 | 6.09 | 3.42 | 308 | 1.26 | 0.29 | 8 | 9.09 | 5.07 |
| 99 | -7980, -610, 40 | 32 | 2.50 | 2.33 | 17 | 5.12 | 1.96 | 59 | 5.51 | 2.01 | 22 | 4.97 | 1.70 | 32 | 3.64 | 1.12 | 21 | 4.52 | 1.58 | 43 | 6.27 | 1.29 | 16 | 4.41 | 4.30 | 55 | 6.14 | 2.14 | 20 | 6.34 | 3.72 | 335 | 1.32 | 0.42 | 8 | 6.81 | 3.15 |
| 100 | -8140, -610, 40 | 50 | 2.31 | 1.67 | 21 | 4.31 | 2.93 | 15 | 5.43 | 3.09 | 18 | 4.62 | 3.40 | 45 | 2.88 | 2.54 | 9 | 5.51 | 1.71 | 42 | 5.82 | 1.16 | 13 | 3.85 | 1.26 | 33 | 4.10 | 2.64 | 15 | 5.16 | 4.37 | 428 | 1.24 | 0.46 | 13 | 5.44 | 4.03 |
| 101 | -8300, -610, 40 | 17 | 3.28 | 1.65 | 19 | 5.09 | 2.32 | 28 | 5.47 | 2.15 | 14 | 6.93 | 3.04 | 18 | 5.16 | 3.14 | 23 | 4.27 | 1.15 | 53 | 4.25 | 0.82 | 23 | 7.56 | 2.15 | 19 | 6.05 | 2.46 | 20 | 5.85 | 3.00 | 393 | 1.34 | 0.39 | 10 | 7.45 | 1.53 |
| **Mean** |  | 42 | 2.74 | 1.62 | 19 | 4.56 | 2.59 | 32 | 5.54 | 2.31 | 17 | 5.17 | 2.89 | 39 | 4.64 | 2.00 | 22 | 4.59 | 2.17 | 42 | 6.19 | 2.35 | 17 | 5.22 | 2.63 | 36 | 4.17 | 2.51 | 19 | 5.72 | 3.28 | 383 | 1.28 | 0.38 | 8 | 8.12 | 4.30 |
